# Supplementary material for: Molecular modelling studies of N-salicylideneamino acidato complexes of oxovanadium(iv). Molecular and crystal structure of a new dinuclear LOVIV–O–VVOL mixed valence complex
Source: Royal Society of Chemistry journal article supplement (doi:10.1039/b205843j), 2002-01-01
Supplement: b205843j1.doc [file b205843j1.doc]

Supplementary Material for manuscript number: B205843J

### Molecular modelling studies of N-Salicylideneamino acidato complexes of Oxovanadium(IV). Molecular and crystal structure of a new dinuclear LOVIVOVVOL mixed valence complex

**João Costa Pessoa,a* Maria J. Calhorda,b,c Isabel Cavaco,a,d Isabel Correia,a M. Teresa Duarte,a Vitor Felix,f R.T. Henriques,a,e Maria F.M. Piedadea,c and Isabel Tomaza**

Details of the specific set of parameters developed for molecular mechanics calculation

**The parameterisation for the MM calculations of the [VIVO(sal-L-aa)(H2O)] 5-coordinated complexes was based on the molecular structure of [VIVO(sal-L-Ala)(H2O)],5 and those for the [VIVO(sal-L-aa)(bpy)] 6-coordinated complexes on the molecular structure of [VIV**O(sal-L-Ala)(bpy)].**9 Molecular mechanics calculations were carried out using the Universal Force Field50 within the CERIUS2 software.51 The minimisation of the molecular structures of [VIVO(sal-L-Ala)(H2O)] and [VIVO(sal-L-Ala)(bpy)] revealed clearly that the default values found in this force field were inappropriate to reproduce accurately the co-ordination spheres of this type of complexes. A specific set of parameters comprising the LM bond lengths and LML angles was developed empirically** using the following procedure:t**he stretching force constants for ideal bond lengths ML were calculated using the equation given in the universal force field,**

*K*ij=664.12 *Z*i*** *Z*j**/* *r*3ij

where *Z*i*** and *Z*j*** are the effective nuclear charges for atoms *i* and *j* and *r*ij is the ideal bond length. The angle bending terms at the metal centre for five and six co-ordination environments were treated individually using a cosine Fourier expansion term. The atom types for both co-ordination spheres, ideal distances and force constants are given in Table SM-1, while the bending angles are listed in Table SM-2. The values of the *r*ij and the angles were optimised by fitting calculated structures to experimental X-ray structures and choosing the values that give the lowest RMS deviation between the computed and experimental co-ordinates for non-hydrogen atoms. The atom types O_R2, N_R3 and N_R2 have the same universal force field proprieties of O_R and N_R, respectively, and they were created in order to allow the individual assignment of the ideal distances or/and bending angles. Default parameters were used for the remaining atom types. Partial charges were not included, as they were difficult to calculate accurately and only have marginal impact on relative strain energies in metal complexes. The starting co-ordinates for all isomers were obtained by manipulation of the atomic co-ordinates of the available X-ray structures. Organic residues (*e.g*. CH2X, CH3, or others) were added or removed, and their initial position changed several times. All structures were minimised using the conjugate gradient algorithm until convergence. High convergence criteria with default parameters was used.

# **Tables SM-1 and SM-2**

Energy differences between the CL- and AL-diastereomers calculated from molecular mechanics

Table SM-3 lists the MM energy difference E*exo/endo* (= E*exo*E*endo*) for the [VIVO(sal-L-aa)(X)] (X= H2O or bpy) complexes, and estimated K = [*endo*]/[*exo*] values (obtained considering only the E*exo/endo* values shown). For species of type [VIVO(sal-L-aa)(H2O)] the differences in the E*exo/endo* are normally quite small, except for the L-Pen and L-*tert*-butyl-Gly, indicating that in the gas phase isomers **Va** (*endo*) and **Vb** (*exo*) have similar stabilities. However, in the solid state the *endo* isomers are normally obtained (Table 1), possibly due to a more favourable packing. For the [VIVO(sal-L-aa)(bpy)] complexes, see main text.

#### Table SM-3

Some additional data and comments to the structures calculated by molecular mechanics

Some relevant molecular dimensions comprising intramolecular distances, angles and torsion angles are given in Table SM-4. As the V atom is normally above the “plane” of the four equatorial donor atoms,27 in the *exo* isomers of 6-coordinate [VIVO(sal-L-aa)(bpy)] complexes there is less space to accommodate the amino acid side group. For this reason in the X-ray molecular structures of the *endo* (*C-*) and *exo* (*A-*) isomers of [VIVO(sal-L-Ala)(bpy)],9 the alanine side group assumes an “axial” arrangement in the *endo* isomer (VC2C10 = 129.4º), and an “equatorial” orientation in the *exo* isomer (VC2C10 = 152º). In the MM structures these angles are ~119º and 129º, respectively (Fig. SM-1). For the other amino acids a similar trend is observed in the MM minimised structures, with the VC2C10 angle normally assuming larger values in the *exo* isomers. Moreover, the torsion angles O1VC2C10 are normally in the range 7º to 3º for the *endo* isomers (*ie*. the V=O group and the C2, C10 atoms nearly belong to the same plane) and 166-173º for the *exo* isomers (Table SM-4). For most *exo* isomers the conformations of the two chelate rings and other relevant structural factors adapt in order to get the lowest energy structure. While in the 5-coordinate [VIVO(sal-L-aa)(H2O)] complexes this is relatively easy to achieve in most cases, in the 6-coordinate [VIVO(sal-L-aa)(bpy)] complexes, namely when the H atoms bonded to C10 are substituted by more bulky groups, rotation around the C2C10 bond may be hindered, and additional strain energy is introduced resulting from increase of angle and torsion terms.

Table SM-4 and Fig. SM-1

The steric control favouring **Va** relative to **Vb** is the result of a delicate compromise that involves the minimisation of all stresses. In our MM calculations we found that one of the most relevant interactions is between C10 and O3. The C10-C3 (C3 is the azomethine carbon) is occasionally also important. In addition, in all MM structures the angle bending and torsion terms contribute significantly for the total steric energy, this often being greater than the *van der Waals* component.

In the majority of MM minimised [VIVO(sal-L-aa)(H2O)] structures the SB ligand displays two planar parts (see Table SM-4): one plane is defined by atoms C1, C2, O2 and O3, while the O4, the aromatic carbon atoms and N1 and/or C3 determines the second plane. The angle between these two planes varies significantly with the amino acid and the diastereomer considered. However, the relative positions of the aromatic ring and chelate rings are approximately the same for all *CL*-isomers (*endo*) and all *AL*-isomers (*exo*), these relative positions differing between the *endo* and *exo* diastereomers. This structural feature is illustrated in Fig. SM-2, where the MM-optimised structures of *C*-[VIVO(sal-L-Leu)(H2O)] - *endo* (Fig. SM-2A) and *A*-[VIVO(sal-L-Val)(H2O)] - *exo* (Fig. SM-2B) are represented. The conformations of the chelate rings in the MM optimised structures are normally as also shown in Fig. SM-2: for (i) the 6-membered ring: V-N1-C3-C4-C5-O4 (A1 and B1), and (ii) the 5-membered ring: V-N1-C2-C1-O2 (-A2 and -B2). The views shown in Fig. SM-2-A1, -A2 and -B1, -B2, used to characterise the conformations of the chelate rings, were drawn along the planes defined by the 3 atoms underlined, *i.e*. they include the metal centre and the two donor atoms of each chelate ring, as usually done for this purpose.SMR-1

##### Figure SM-2

In the MM geometry’s, while angles O1VO4, O1VO2, O1VN1 and O1VO5 do not depend much on the amino acid, or on the diastereomer considered. Moreover, the torsion angles defining the relative positions of the donor atoms of the SB ligand and the vanadyl unit show characteristic patterns for the *CL-* or *AL-*isomers. Table SM-4 shows that while the torsion angles O1VO4C5 and O1VN1C2 are always positive for the *CL*- and negative for the *AL*-diastereomers, those of O1VO2C1 and O1VN1C3 are always negative for the *CL*- and positive for the *AL*-diastereomers. If we consider the lowest energy conformers obtained in the MM calculations as good approximations for the solution structures of the *CL*- and *AL*-diastereomers, we would expect that the possibility of each donor group, namely the Ophenolate, to establish  bonds with vanadium d orbitals, particularly the dxy orbital, differs for the *CL*- and *AL*-diastereomers. However, in our DFT results for the *C*- and *A*-[VIVO(sal-L-Ala)(H2O)] diastereomers, the contributions of the Ophenolate to the SOMO orbital was found to be small (~5 and ~7%, respectively). Notwithstanding, they may be more significant for other amino acid Schiff base complexes. This may also be seen in *e.g*. Fig. SM-3, where the torsion angle O1VO4C5 is 115.7º in *C*-[VIVO(sal-L-Met)(H2O)] (Fig. SM-3-A1) and 56.2º in *A*-[VIVO(sal-L-Met)(H2O)] (Fig. SM-3-B1). Differences may also be seen in the torsion angles O1VO2C1 (Fig. SM-3-A2 and -B2).

##### Figure SM-3

Once some stereochemical characteristics differ, one could suggest that the two diastereomers should have some distinct spectroscopic properties, *e.g*. the contributions of Ophenolate to the hyperfine coupling constant. Although these comments are relevant, the structures considered in Figs. SM-2 and -3 and Table SM-4 are an oversimplification of those that may be present in solution for the *CL*- and *AL*-diastereomers. Moreover the distinct features may further average or mostly cancel out if both isomers are present in similar concentrations. This indeed occurs for most of the 5-coordinate [VIVO(sal-aa)(H2O)], but possibly not for the 6-coordinate [VIVO(sal-aa)(bpy)] complexes. Anyway, the experimental A|| values obtained do not show any trend related to the E*exo/endo* shown in Table SM-3. This may either result from the Ophenolate, Ocarboxylate, Nimine contributions to the hyperfine coupling constant remaining constant for both diastereomers, or their overall contribution remaining constant, but not the individual contributions (*e.g*. if one increases, one of the others decrease).

**Some additional data and comments to the DFT calculations**

The DFT calculations agree well, as expected, with the recently reported DFT calculations also using the ADF program.59 Our DFT calculations also agree well with the X-ray diffraction data for VO(H2O)5SO4 (composed of isolated VIVO(OH2)52+ units and isolated SO42 tetrahedra),60 and again some small differences result from different symmetry and conditions being implicit in the application of both techniques. In the ESEM and ENDOR measurements the VH distances were determined from the dipolar hyperfine splittings and the VO distances calculated indirectly assuming the water molecule dipole is oriented towards the V atom.55 The agreement between the data for VHequatorial and VHaxial bond distances is good. The differences are in most cases of the order of magnitude of experimental errors. The SOMOS of the three oxovanadium(IV) complexes: *C*- and *A*-[VIVO(sal-L-Ala)(H2O)], and [VIVO(H2O)5]2+ are shown in Figure SM-4. The -donating properties of the Schiff base ligand are well reflected in the antibonding VO(phenolate, carboxylate) character of the SOMO of *C*-[VIVO(sal-L-Ala)(H2O)] and those of the *AL*-.

**Figure SM-4**

**Additional comments to the discussion of the IR spectra of oxovanadium(IV) N-salicylidene complexes and that of NaV2O3(MeOsal-L-Ile)2H2O 1**

The IR spectrum for C-VIVO(sal-L-Ala)(H2O) was obtained from a frequency calculation with the ADF program (details in the Experimental Section and text). Table SM-6 summarises the most intense bands in the calculated and experimental spectra, as well as the main groups involved in the vibrations. There are systematic errors in frequency calculations and scaling factors are often applied to obtain better values.

Table SM-6

# **In the FTIR of NaV2O3(MeOsal-L-Ile)2H2O** 1 **several m-s bands show up in the range 2840-2980** cm1 due to the methyl CH stretch. Very strong bands appear at 1710, 1670 and ~1612 cm1, the latter is broad and has a shoulder in the lower wavenumber side due to overlap with aromatic ring-carbon stretching. In vanadium N-salicylideneamino acidate complexes, bands at 1620-1660 cm1 and at 1590-1620 cm1 have been attributed to n(C=N) and nas(COO), respectively. There are two distinct C=N and COO groups in the present case. Some rough estimates of n(C=N) may be done. The C=N bond distances are 1.284  0.009, 1.288  0.008 Å, so these may span between 1.275 and 1.296 Å. In order to estimate the spectral region for the stretching vibration, one can useSMR-2 the equation for simple harmonic oscillator [n = 1307 (k/µ)1/2] (where n is the wave number in cm1, µ is the reduced mass of the atom pair and k is the force constant x 105 in dyne/cm). Using the Gordy's rule to estimate the force constants,SMR-3 assuming the bond order is two, one can estimate n(C=N) = 1710 and 1670 cm1 from the bond distances: 1.275 and 1.296 Å, respectively. These agree well with two of the observed values. However, one should take into account that these are oversimplified estimates, the observed “C=N stretching” in fact being complex vibrations involving all molecule, probably appearing at *ca*. 1600-1620 cm1 in 1. H-bonds formed with the COO, as in the case of *C*-VIVO(sal-L-Ala)(H2O) and in **1**, may also lower the wave number of the nas(COO) band. Taking into account the results obtained by the ADF program mentioned in the text and Table SM-6, we conclude that the bands at 1620-1660 cm1 and at 1600-1620 cm1 bands should be ascribed to nas(COO) and n(C=N), respectively.

The calculated ns(COO) for *C*-VIVO(sal-L-Ala)(H2O) (Table SM-6) is at 1210 cm1, and there are at least five strong bands in the 1210-1300 cm1 range in the IR of **1**. Based on the calculated value included in Table SM-5 we ascribe the symmetric carboxylate stretch of **1** to one (or both) of the medium/strong bands at 1212 and 1231 cm1. The large difference between nas(COO) and ns(COO) agrees with the monodentate co-ordination of this group to vanadium.SMR-4

Making a parallelism with NaV2O3(sal-D,L-Ser)25H2O,7 and Et4NV2O3(sal-L-ala)2MeCN,16 the nas(VOV), n(VOaryl), n(VN), n(VOcarboxylate) may be tentatively ascribed to the bands at 752, 520, 469 and 440 cm1, respectively. However, some of these bands could be ascribed to aromatic out-of-plane =CH bending, or out-of-plane ring C=C bending bands, as these may show up atSMR-5 730-760 cm1 or 430-700 cm1, respectively (see also Table SM-6).

**Magnetic Susceptibility measurements**

Experimental

Magnetic susceptibility measurements were made for a polycrystalline sample of **1** (5.8 mg), in the range 4-289 K using a 7 Tesla Oxford Instruments Faraday system operating at 5 Tesla, with forward and reverse gradients of 1 T/m.

Discussion

The magnetic susceptibilities of a polycrystalline sample of **1** was measured by the Faraday method in the range 4-289 K. The paramagnetic molar susceptibilities were obtained from the experimental results after subtracting the diamagnetic contribution estimated from tabulated Pascal's constantsSMR-6 as 3.63  104 emu mol1. Room temperature values are p= 4.9104 emu mol1 and eff = 1.06 B. The effective magnetic moment increases when cooling reaching 1.64 B. at 18 K. Below this temperature it decreases slightly being 1.59 B at 4K. These values are calculated for a formula unit which contains two vanadium atoms, so the eff values are below the theoretical for a compound with spin 1/2 per formula unit. These results cannot be easily explained. They were measured with a polycrystalline sample and if small amounts of VIVOVIV and/or VVOVV impurities are present in the solid, odd magnetic properties may result.

The structure of **1** determined by X-ray diffraction corresponds to an *anti*-orthogonal arrangement of the V2O33+ core. This configuration allows effective delocalization of the electron over both vanadium ions, as was observed in other similar mixed-valence complexes, *eg*. V2O3(nta)23,52 V2O3(pmida)2 53 and V2O3(sal-L-Ala)2,16 where the very strong intramolecular antiferromagnetic coupling is expected to proceed via this superexchange pathway.65,66

**References (specific for the supplementary material)**

**SMR-1** C.J. Hawkins, *Absolute Configurations of Metal Complexes*, Wiley-Interscience, New York, 1971, pp. 9-13.

**SMR-2** R.C. Gore and E.S. Waight, in *Determination of Organic Structures by Physical Methods*, ed. E. A. Braude and F. C. Nachod, 1955, New York, Academic Press, pp. 208-9.

**SMR-3** W. Gordy, *J. Chem. Phys.*, 1946, **14**, 305.

**SMR-4** G.B. Deakon, R.J. Phillips, *Coord. Chem. Ver.*, 1980, 33, 227-250; K. Nakamoto, *Infrared and Raman Spectra of Inorganic Compounds*, 1997, 5th Ed., Part B, pp. 60-61.

**SMR-5** R.M. Silverstein, G.C. Bassler and T.C. Morril, in *Spectrometric Identification of Organic Compounds*, John Wiley & Sons, New York, 5th Ed., 1991, pp.122-5.

**SMR-6** P. W. Selwood, *Magnetochemistry*, Interscience Publishers Inc, New York, 1956.

**Legends to figures of the supplementary material**

###### Figure SM-1 MM-structures (lower energy conformers) calculated for the *AD*-[VIVO(sal-D-Ala)(bpy)] (*endo* isomer) and *CD*-[VIVO(sal-D-Ala)(bpy)] (*exo* isomer). Note that the *endo* isomers *AD*-, *CL*- and the *exo* isomers *CD*-, *AL*- are enantiomeric pairs. The equatorial and axial bipyridine N atoms will be denoted by N2 and N3, respectively.

###### Figure SM-2 MM geometries emphasising the typical relative positions of the vanadyl unit and the SB donor groups for the *endo-* and *exo-*diastereomers. The geometries correspond to the most stable conformers of (A) *C*[VIVO(sal-L-Leu)(H2O)] and (B) *A*[VIVO(sal-L-Val)(H2O)] (several atoms were deleted for clarity). Rather similar stereochemical characteristics are observed in other (among the most stable) conformers of these and other sal-L-aa ligands studied here). Views of the 6-membered chelate rings V-N1-C3-C4-C5-O2, A1: almost planar and B1: slightly asymmetric boat conformation. Views of the 5-membered chelate rings V-O2-C1-C2-N1, A2: asymmetric envelope conformation and B2: asymmetric envelope conformation (close to a puckered conformation).

###### Figure SM-3 MM-structures emphasising the relative positions of the vanadyl unit and the Ophenolate (view along the O4V bond) and Ocarboxylate (view along the O2V bond) donor groups for the (A) *endo*- and (B) *exo*-diastereomers. The geometries correspond to the most stable conformers of *C-* and *A-*[VIVO(sal-L-Met)(H2O)] (H atoms were deleted for clarity), and rather similar stereochemical characteristics are observed in other (among the most stable) conformers of this and other sal-L-aa ligands studied here.

**Figure SM-4** Singly occupied SOMOs of the two diastereomers of [VIVO(sal-L-Ala)(H2O)] {*C*- (top) and *A*- (center)}, and of [VIVO(H2O)5]2+ (bottom).
