# Supplementary material for: Molecular modelling studies of N-salicylideneamino acidato complexes of oxovanadium(iv). Molecular and crystal structure of a new dinuclear LOVIV–O–VVOL mixed valence complex
Source: Royal Society of Chemistry journal article supplement (doi:10.1039/b205843j), 2002-01-01
Supplement: b205843j6.doc [file b205843j6.doc]

| Table SM-6 - Calculated (ADF-2000) and observed infrared wavenumbers for the *CL*-[VO(sal-L-Ala)(H2O)] complex.[a] | | |
| --- | --- | --- |
| Type of vibration | Calculated /cm1 (intensity[b]) | /cm1 (KBr disk)  (intensity[c]) |
| ** H2O, CH3 and COO twisting;  benzene- CH out-of plane and ring deformation | 416.8 (0.38) | ~420, 440 |
| ** H2O and CH3 wagging; VOPhenolateC scissoring;  benzene- CH out-of plane and ring deformation | 470.5 (0.337)  476.5 (0.565) | 484 (0.12) |
| ** H2O twisting; COO scissoring/wagging  benzene- CH wagging | 645.1 (0.270) | 620 (0.92) |
| *benzene- CH wagging  CH3 twisting, H2O wagging | 733.8 (0.247) | 759 (0.89) |
| CH3 twisting, * benzene- CH scissoring | 780.5 (0.245) | 810 (0.65) |
| * V=O stretching; CH (CH3) twisting and wagging; H2O wagging | 1028.7 (1.0) | 996 (1.0) |
| *CH3 and *CH () twisting  benzene-CH rocking | 1038.3 (0.247) | 1067 (0.48) |
| CO stretch (almost symmetric)  HC(=N) wagging; Benzene- CH wagging | 1210.5 (1.189) | 1127 (1.41)  1146 (1.39)  1208 (0.53) |
| * CH3 and HC(=N) twisting, -CH rocking;  benzene-CH twisting, COPhenolate wagging | 1329.1 (0.702) | 1289 (0.82) |
| * CH3 wagging, HC(=N) and -CH twisting;  benzene-CH rocking | 1370.3 (0.323) | 1363 (0.75) |
| * benzene-C=C stretching, COPhenolate wagging  benzene-CH rocking, HC(=N) wagging | 1529.4 (0.512) | 1447 (0.84) ? |
| * H2O scissoring | 1540.7 (0.702) |  |
| * benzene-CH twisting;  CH3 and HC(=N) wagging | 1560.0 (0.434) | 1546 (0.85) |
| * C=N stretch;  HC(=N) out-of-plane bending, CH3 and benzene-CH twisting | 1603.2 (2.097) | 1599 (1.29) |
| * C=O stretch;  H2O and CH3 wagging, HC(=N) and benzene-CH twisting | 1720.8 (3.197) | 1627 (1.38) |
| Symmetric OH stretch | 3610.3 (0.344) | broad band |
| Antisymmetric OH stretch | 3742.7 (0.655) | broad band |

**Footnotes of Table SM-6**

[a] For almost all calculated wavenumbers all molecule is involved in the vibration and the main group involved is mentioned first. If no particular group may be emphasized a ** is included. If all molecule vibrates but one of the groups is more involved than others we include a * for this group.

[b] The intensities given are relative to the 1028.7 cm1 band. The absorption intensity calculated for this band was 179.60 km mol1.

[c] The intensities given are relative to the 996 cm1 band, normally attributed to the stretching of the V=O, which may be considered as a strong band.
