# Supplementary figures and images for: Molecular modelling studies of N-salicylideneamino acidato complexes of oxovanadium(iv). Molecular and crystal structure of a new dinuclear LOVIV–O–VVOL mixed valence complex
Source: Royal Society of Chemistry journal article supplement (doi:10.1039/b205843j), 2002-01-01

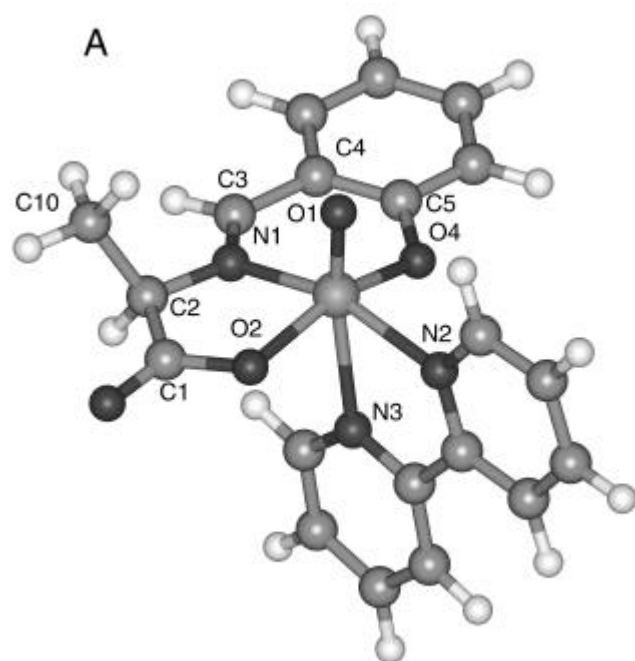

Supplement: b205843j1.pdf [file b205843j1.pdf]

B

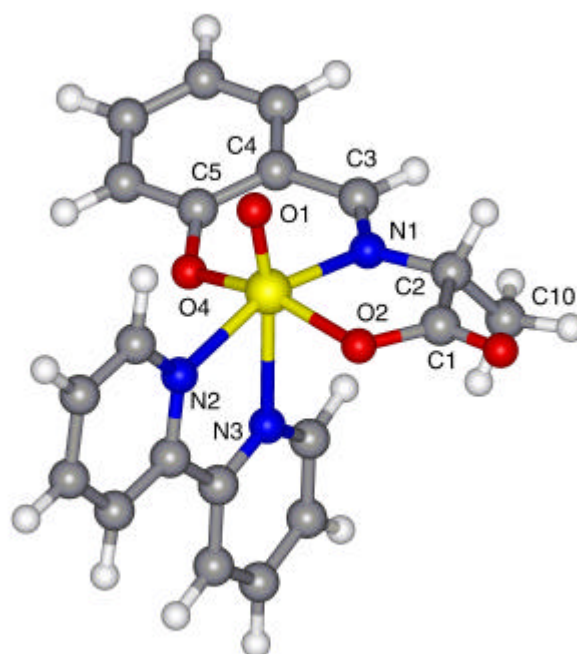

Supplement: b205843j2.pdf [file b205843j2.pdf]
